# Supplementary material
Source: publisher site journal article supplement (https://www.dovepress.com/article/323435)
Supplement: Supplementary file 1 [file get_supplementary_file.php]

## SUPPLEMENTARY FIGURES

WNT16 is robustly increased by Oncostatin M and acts as a negative feed-back regulator of periosteal osteoclast formation induced by Oncostatin M

PETRA HENNING<sup>1</sup>, SOFIA MOVERARE-SKRTIC<sup>1</sup>, ANNA WESTERLUND<sup>1</sup>, PEDRO P. C. SOUZA<sup>2,3</sup>, THAIS FLORIANO-MARCELINO<sup>3</sup>, KARIN NILSSON<sup>1</sup>, MAHA EL SHAHAWY<sup>4,4</sup>, CLAES OHLSSON<sup>1</sup>, ULF H. LERNER<sup>1</sup>

*Author affiliations: <sup>1</sup>Department of Internal Medicine and Clinical Nutrition, Institute of Medicine, Sahlgrenska Osteoporosis Centre and Centre for Bone and Arthritis Research at the Sahlgrenska Academy, University of Gothenburg, Gothenburg, Sweden, <sup>2</sup>the Innovation in Biomaterials Laboratory, School of Dentistry, Federal University of Goiás, Brazil, and the <sup>3</sup>Department of Physiology and Pathology, São Paulo State University (UNESP), School of Dentistry, Araraquara, Brazil, <sup>4</sup>Present address: Department of Oral Biology, Faculty of Dentistry, Minia University, Minia 61511, Egypt*

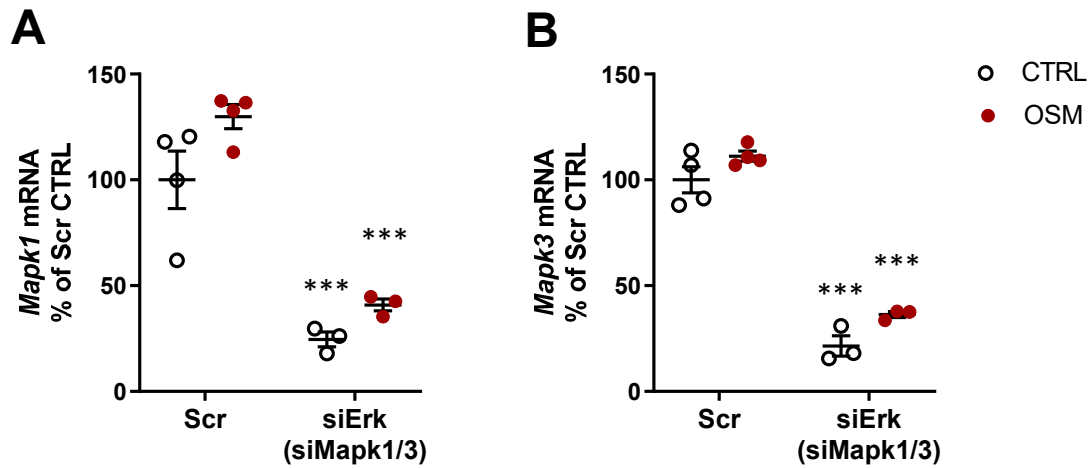

**Supplementary Fig. 1. Expression of *Mapk1* and *Mapk3* mRNA in calvarial periosteal osteoblast cultures after silencing using siRNA.**

The expression of *Mapk1* and *Mapk3* was simultaneously silenced in primary calvarial osteoblast cultures using siRNA. Cells were treated with 100 ng/ml mOSM for 24 h and thereafter *Mapk1* and *Mapk3* expression was analyzed. Scrambled siRNA (Scr) was used as control. Individual values are presented in all graphs with the mean presented as horizontal lines and  $\pm$ SEM as vertical lines. \*\*\* $P < 0.001$  vs. respective Scr, two-way ANOVA followed by Sidak's multiple comparison test.

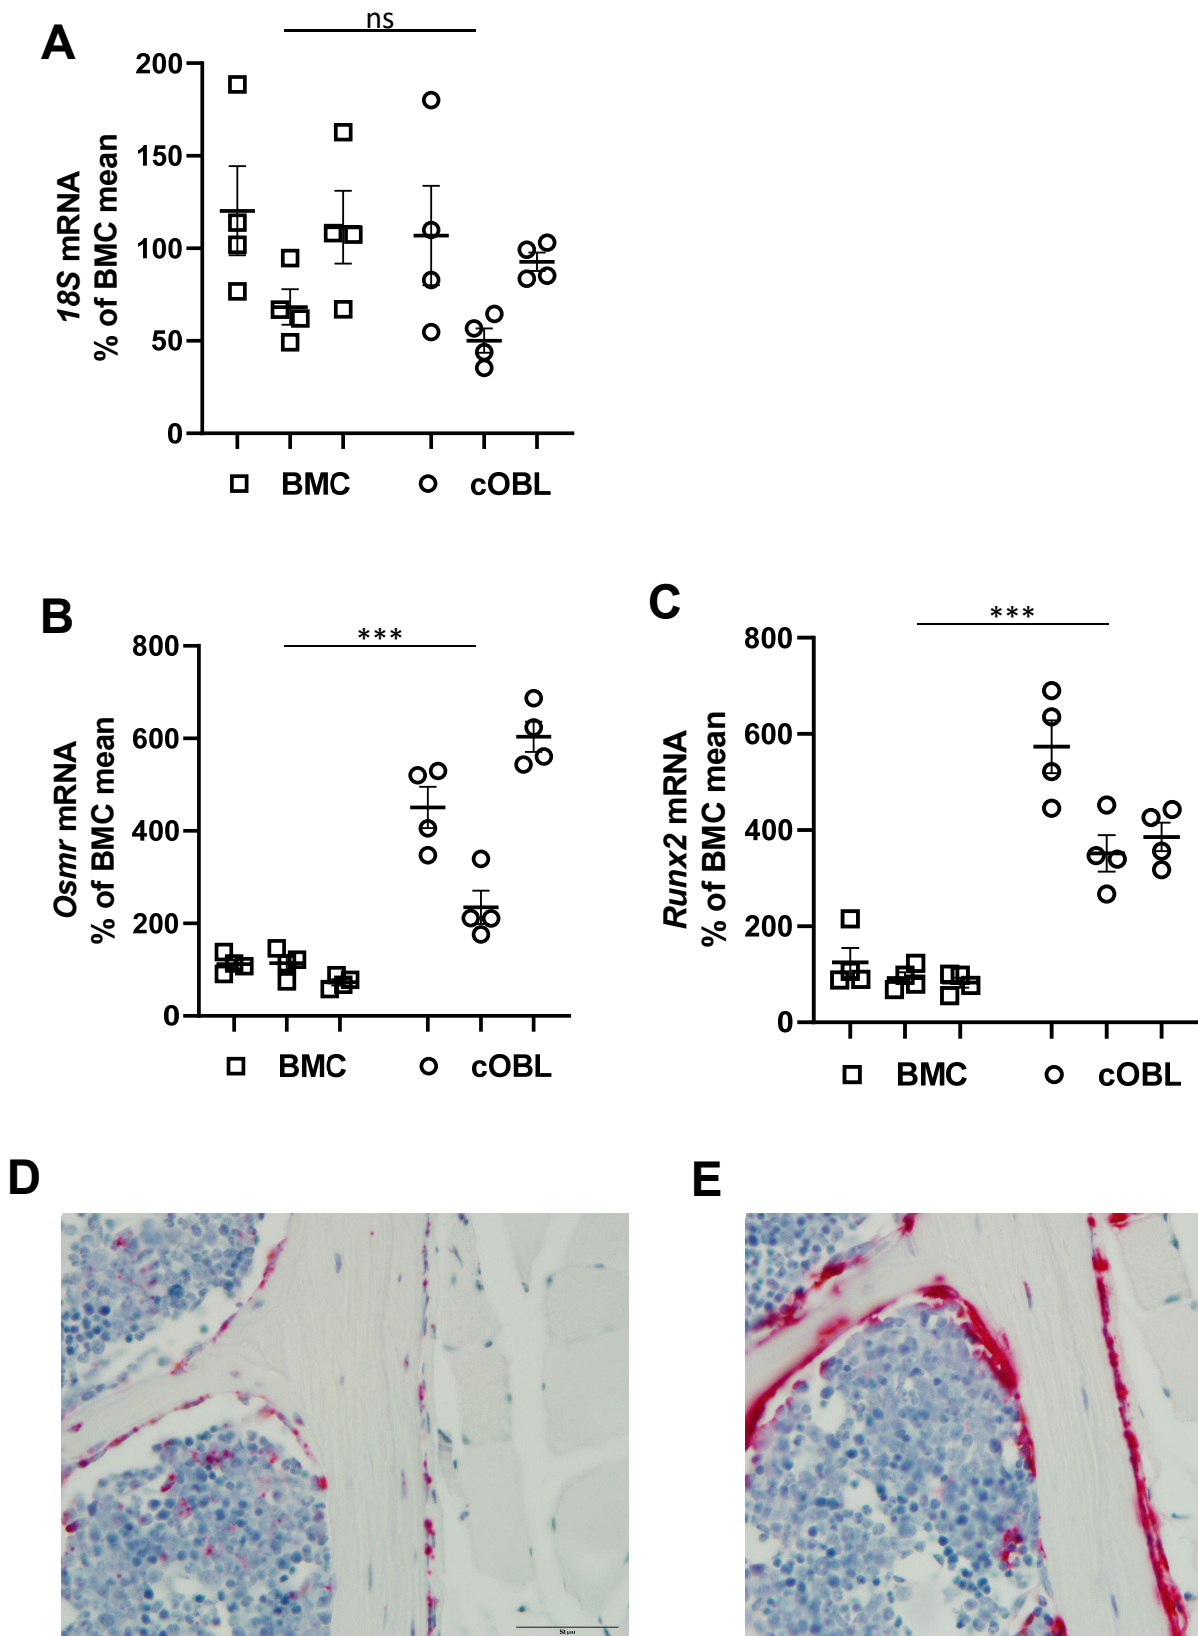

**Supplementary Fig. 2. Gene expression in bone marrow cells vs. periosteal cells analyzed by PCR and *in situ* hybridization.** Expression of *18S* (A), *Osmr* (B) and *Runx2* (C) in three bone marrow cell (BMC) cultures and three calvarial periosteal cell (cOBL) cultures cultured in osteogenic media for 7 and 6-8 days, respectively. Individual values are presented in all graphs with the mean presented as horizontal lines and  $\pm$ SEM as vertical lines. \*\*\* $P < 0.001$  BMC vs. cOBL, two-way ANOVA. RNAscope of *Runx2* (D) and *Col1a1* (E) expression (red) in L5 vertebrae. Scale bar, 50  $\mu$ m.

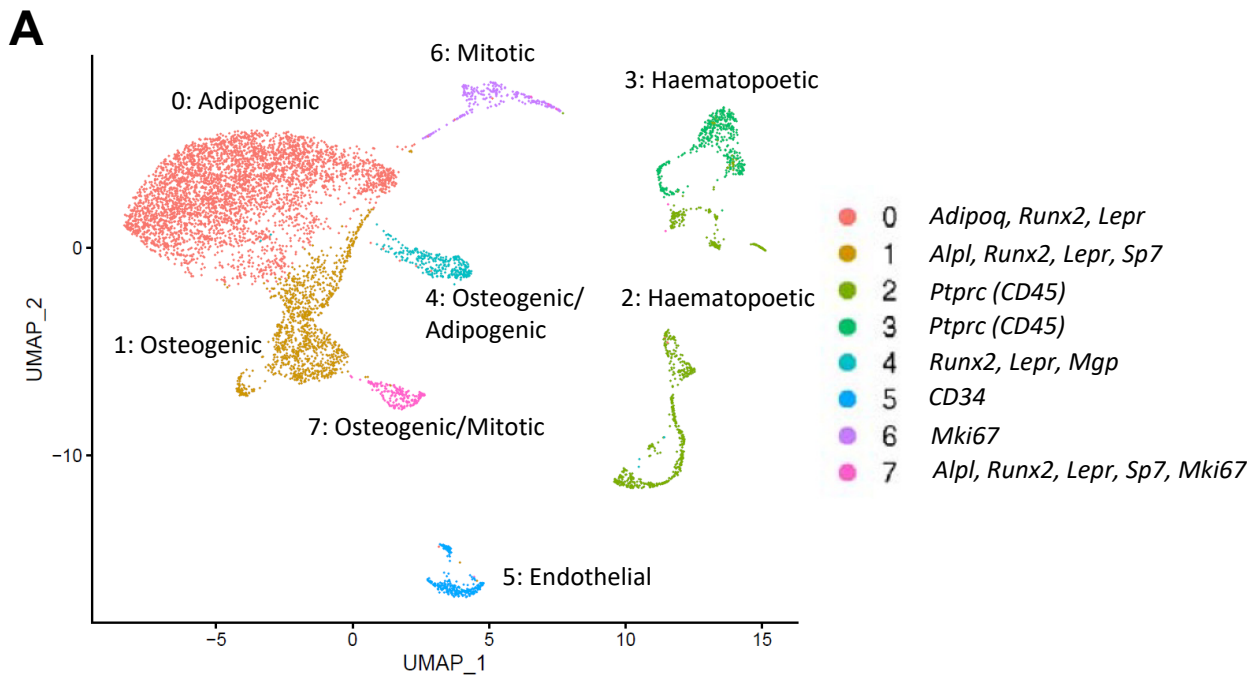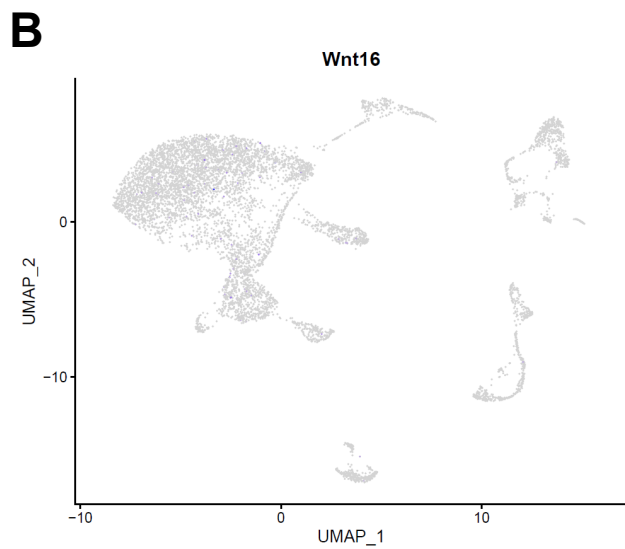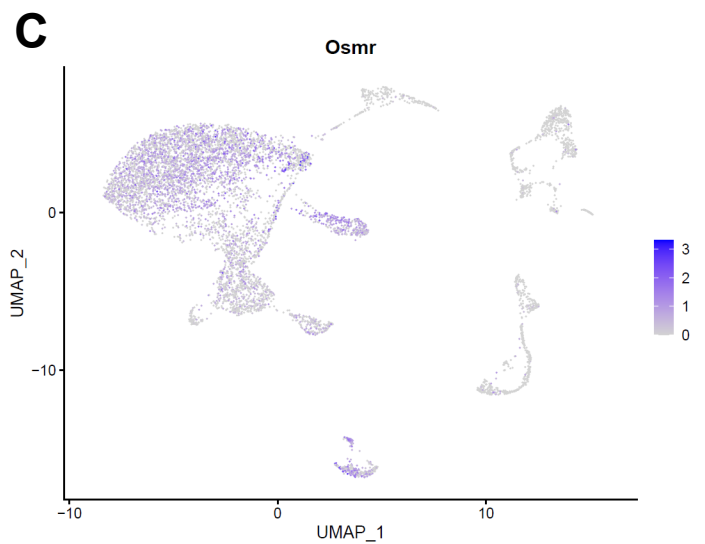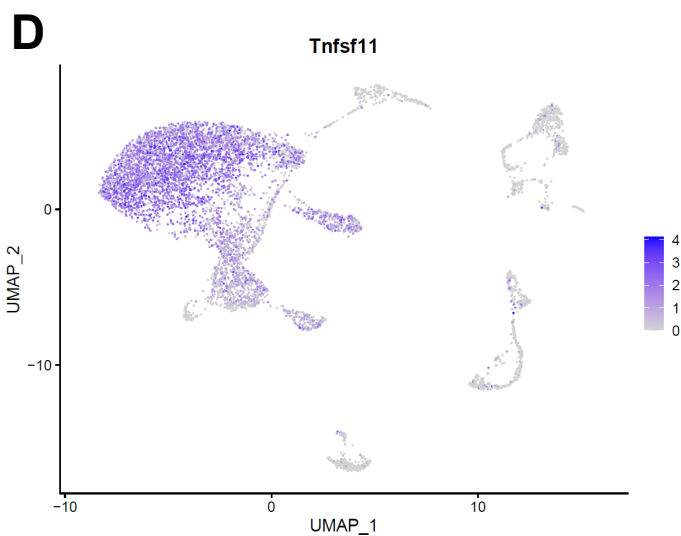

**Supplementary Fig. 3. Single cell RNA sequencing analysis of *Cxcl12* expressing bone marrow stromal cells. (A) UMAP-based visualization of major cell clusters (Cluster 0-7) and cluster expressed genes (right). Feature plots of *Wnt16* (B), *Osmr* (C) and *Tnfsf11* (D) expression.**
